# Supplementary material for: Fluorescent filter paper with pH-responsive carbon dots for the on-site detection of biogenic amines in food
Source: Royal Society of Chemistry journal article supplement (doi:10.1039/d3nj00646h), 2023-01-01
Supplement: d3nj00646h1.pdf [file d3nj00646h1.pdf]

1 **Supporting Information**

2

3 Fluorescent filter paper via pH-responsive carbon dots for on-site detection of  
4 biogenic amines in food

5 Jianfeng Yan<sup>a#</sup>, Quanbin Fu<sup>a,b#</sup>, Shikai Zhang<sup>a,b</sup>, Xianbao Shi<sup>a</sup>, Yuanhong Zhang<sup>a</sup>,  
6 Juying Hou<sup>a</sup>, Junling Duan<sup>a\*</sup>, Shiyun Ai<sup>a\*</sup>

7 <sup>a</sup>College of Chemistry and Material Science, Shandong Agricultural University,  
8 Tai'an, Shandong 271018, P.R. China

9 <sup>b</sup>College of Food Science and Engineering, Shandong Agricultural University, Tai'an,  
10 Shandong 271018, P.R. China

11 *\*Address for correspondence. Email: jlduan@sdau.edu.cn, ashy@sdau.edu.cn*

12 *#The authors contributed equally as first author.*

13

16 1. Synthesis of N, S-CDs

17 2. Quantum yield measurement

18 **1. Synthesis of N, S-CDs**

19 The CDs was synthesized by one-step hydrothermal treatment with minor  
20 modification. Specifically, N-acetyl-L-cysteine (0.08 g, 0.5 mmol) and citric acid  
21 (0.13 g, 0.68 mmol) were mixed and dissolved in 8 mL of deionized water. In this  
22 segment, sodium hydroxide solution was used to adjust the pH of the solution to 7.  
23 Then, the mixed solution was introduced to the Teflon-lined autoclave for reaction at  
24 200 °C for 3 h. After cooling to room temperature, a clear, brown solution was  
25 obtained. The subsequent purification was achieved through filtration of 0.22 μM  
26 filter membrane. Finally, the N, S-CDs solution was diluted to 45 mL and stored at 4  
27 °C for further study.

28 **2. Quantum yield measurement**

29 In the experiment, the fluorescence quantum yield ( $\Phi_S$ ) was calculated by using  
30 quinine sulfate ( $\Phi_R = 0.54$ ) as the standard according to the literature method. The  
31 absorbance and fluorescence spectra of N, S-CDs and Rhodamine B were measured  
32 respectively. In general, it is necessary to ensure that the absorbance does not exceed  
33 0.1, and the area of fluorescence intensity is calculated by integration. The  
34 fluorescence quantum yield is calculated by the following formula:

$$35 \frac{\Phi_S}{\Phi_R} = \frac{Y_S}{Y_R} \times \frac{(A)_R}{(A)_S} \times \frac{\eta_S^2}{\eta_R^2}$$

36 Among them,  $\Phi$  is the fluorescence quantum yield,  $Y_S$  and  $Y_R$  are the integrated areas  
37 of the fluorescence peaks of the N, S-CDs and the Rhodamine B,  $A_S$  and  $A_R$  are the  
38 absorbance at 350 nm, and  $\eta_S$  and  $\eta_R$  are the solvent refractive indexes.

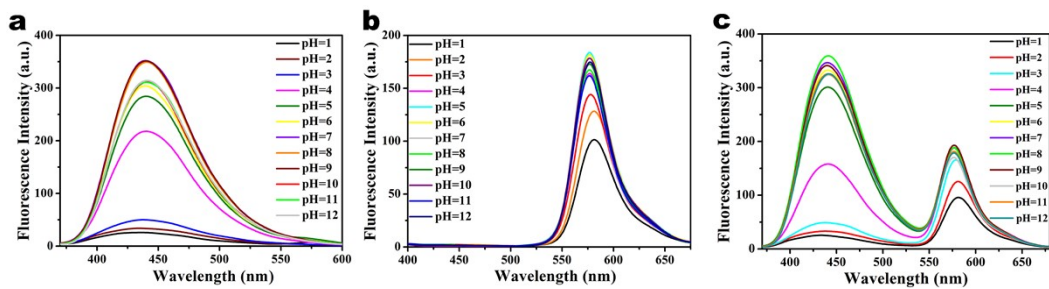

40

41 **Fig. S1** Fluorescence spectra of (a) Rb, (b) N, S-CDs, and (c) Rb@N, S-CDs at  
 42 different pH values.

43

44

45

46

47

48

49

50

51

52

53

54

55

56

57

58

59

60

61

62

63

64

65

66

67

68

69

70

71

72

73

74

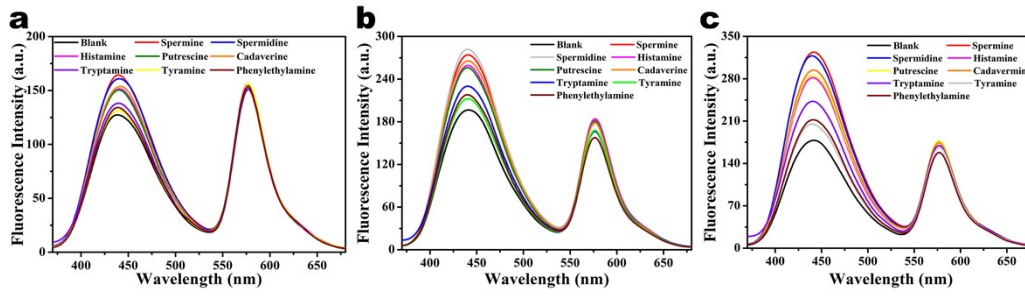

75

76 **Fig. S2** Fluorescence spectra of Rb@N, S-CDs adding different concentrations of  
 77 BAs: (a) 12.5  $\mu\text{M}$ , (b) 25  $\mu\text{M}$ , and (c) 50  $\mu\text{M}$ .

78

79

80

81

82

83

84

85

86

87

88

89

90

91

92

93

94

95

96

97

98

99

100

101

102

103

104

105

106

107

108

109

110

111 **Table S1** Analytical data of Rb@N, S-CDs for different BAs.

| Analytes         | Linear range ( $\mu\text{M}$ ) | Calibration curve  | $R^2$  | LODs ( $\mu\text{M}$ ) | LOQs ( $\mu\text{M}$ ) | Repeatability (%) |
|------------------|--------------------------------|--------------------|--------|------------------------|------------------------|-------------------|
| Spermine         | 0-50                           | $y=0.0259x+0.8273$ | 0.9967 | 0.733                  | 2.443                  | 2.5               |
| Spermidine       | 0-60                           | $y=0.0210x+0.7940$ | 0.9942 | 0.891                  | 2.971                  | 1.4               |
| Putrescine       | 0-75                           | $y=0.0145x+0.7134$ | 0.9953 | 1.407                  | 4.692                  | 3.6               |
| Cadaverine       | 0-125                          | $y=0.0074x+0.4406$ | 0.9944 | 2.536                  | 8.453                  | 6.0               |
| Histamine        | 0-75                           | $y=0.0105x+0.5750$ | 0.9957 | 1.070                  | 3.567                  | 4.5               |
| Tryptamine       | 0-112.5                        | $y=0.0086x+0.9678$ | 0.9966 | 3.673                  | 12.241                 | 2.5               |
| Tyramine         | 0-150                          | $y=0.0039x+0.9791$ | 0.9988 | 3.049                  | 10.165                 | 5.7               |
| Phenylethylamine | 0-125                          | $y=0.0048x+0.5517$ | 0.9981 | 3.943                  | 13.143                 | 5.6               |

112
